# Supplementary material
Source: PubMed Central journal article supplement (PMC3067784)
Supplement: supp_85_5_2189__1.pdf [file supp_85_5_2189__1.pdf]

Supplementary table 1: Genes modulated at 8h post-treatment.

| Affy ID     | Symbol   | NL4.3 wt<br>8h | NL4.3<br>CD40L 8h | Anti CD40<br>8h | NL4.3 wt<br>24h | NL4.3<br>CD40L 24h | Anti CD40<br>24h |
|-------------|----------|----------------|-------------------|-----------------|-----------------|--------------------|------------------|
| 216834_at   | RGS1     | 0.142          | 4.153             | 11.24           | 0.596           | 5.136              | 9.073            |
| 208684_at   | COPA     | 0.346          | 4.728             | 8.927           | 1               | 0.746              | 1.326            |
| 204798_at   | MYB      | 0.458          | 5.025             | 8.882           | 0.999           | 1.217              | 0.765            |
| 201946_s_at | CCT2     | 0.223          | 2.433             | 3.926           | 0.987           | 0.793              | 1.206            |
| 205599_at   | TRAF1    | 0.894          | 7.514             | 16.76           | 0.575           | 1.823              | 3.59             |
| 201066_at   | CYC1     | 0.645          | 5.551             | 7.75            | 1               | 0.591              | 1.851            |
| 201669_s_at | MARCKS   | 0.92           | 5.79              | 13.66           | 0.941           | 1.53               | 5.174            |
| 202638_s_at | ICAM1    | 0.854          | 5.719             | 10.95           | 1               | 2.228              | 3.582            |
| 201323_at   | EBNA1BP2 | 0.713          | 5.305             | 7.68            | 0.984           | 0.856              | 2.24             |
| 219540_at   | ZNF267   | 0.8            | 5.041             | 7.555           | 0.948           | 1.837              | 1.757            |
| 206975_at   | LTA      | 0.997          | 4.769             | 11.76           | 0.984           | 5.893              | 9.963            |
| 200825_s_at | HYOU1    | 0.487          | 3.131             | 4.117           | 0.764           | 1.552              | 1.494            |
| 207900_at   | CCL17    | 0.997          | 5.285             | 9.862           | 0.991           | 8.147              | 12.94            |
| 201920_at   | SLC20A1  | 0.961          | 5.055             | 9.445           | 0.999           | 2.78               | 4.711            |
| 205681_at   | BCL2A1   | 0.976          | 4.682             | 10.13           | 0.997           | 1.619              | 3.272            |
| 201502_s_at | NFKBIA   | 0.993          | 5.037             | 7.961           | 1               | 3.411              | 5.807            |
| 201426_s_at | VIM      | 0.753          | 3.252             | 6.59            | 0.992           | 0.734              | 1.926            |
| 220358_at   | SNFT     | 0.998          | 4.713             | 7.506           | 0.998           | 4.063              | 10.39            |
| 200886_s_at | PGAM1    | 0.597          | 2.711             | 4.386           | 1               | 0.941              | 0.817            |
| 219841_at   | AICDA    | 0.948          | 3.398             | 8.564           | 0.959           | 3.429              | 5.403            |
| X00351_5_at | ACTB     | 0.511          | 2.212             | 3.731           | 0.96            | 0.364              | 1.579            |
| 201177_s_at | UBA2     | 0.655          | 3.046             | 4.185           | 0.94            | 1.628              | 1.472            |
| 202820_at   | AHR      | 0.783          | 3.475             | 5.217           | 0.999           | 2.117              | 1.688            |
| 201739_at   | SGK      | 0.692          | 2.388             | 4.994           | 0.936           | 0.811              | 1.231            |
| 206760_s_at | FCER2    | 0.997          | 3.541             | 6.568           | 0.89            | 1.127              | 2.528            |
| 202433_at   | SLC35B1  | 0.964          | 3.568             | 6.04            | 1               | 0.667              | 0.875            |
| 208885_at   | LCP1     | 0.814          | 3.04              | 4.958           | 0.991           | 1.35               | 2.842            |
| 202644_s_at | TNFAIP3  | 0.983          | 3.74              | 5.819           | 0.998           | 2.666              | 4.927            |
| 205022_s_at | CHES1    | 0.661          | 2.702             | 3.498           | 0.996           | 0.377              | 0.48             |
| 208925_at   | CLDND1   | 0.859          | 3.968             | 3.939           | 0.982           | 0.517              | 0.792            |
| X00351_M_at | ACTB     | 0.596          | 2.288             | 3.256           | 0.995           | 0.6                | 1.674            |
| 205218_at   | POLR3F   | 0.977          | 4.142             | 4.639           | 0.972           | 0.389              | 1.21             |
| 203414_at   | MMD      | 0.885          | 2.753             | 5.542           | 0.948           | 1.152              | 1.714            |
| 209162_s_at | PRPF4    | 0.72           | 2.878             | 3.403           | 0.998           | 0.313              | 0.744            |
| 203740_at   | MPHOSPH6 | 0.718          | 2.578             | 3.744           | 0.997           | 1.327              | 1.877            |
| 219753_at   | STAG3    | 1              | 3.959             | 4.608           | 0.612           | 1.103              | 1.907            |
| 216885_s_at | WDR42A   | 0.97           | 3.789             | 4.485           | 0.991           | 1.297              | 1.248            |
| 53912_at    | SNX11    | 0.993          | 3.12              | 5.579           | 0.977           | 3.118              | 3.178            |
| 201075_s_at | SMARCC1  | 0.911          | 3.057             | 4.696           | 0.995           | 1.478              | 1.669            |
| 212312_at   | BCL2L1   | 0.956          | 3.555             | 4.436           | 0.965           | 1.722              | 5.042            |
| 212038_s_at | VDAC1    | 0.984          | 3.328             | 4.943           | 0.988           | 0.837              | 1.365            |
| 218926_at   | MYNN     | 0.925          | 4.06              | 3.575           | 0.996           | 0.764              | 0.367            |
| M27830_5_at | ---      | 0.696          | 0.203             | 0.143           | 0.641           | 2.574              | 1.675            |
| 204385_at   | KYNU     | 0.853          | 2.462             | 4.81            | 0.966           | 1.22               | 2.723            |
| M10098_5_at | ---      | 1              | 0.282             | 0.22            | 0.953           | 3.713              | 3.902            |
| 205668_at   | LY75     | 0.927          | 3.41              | 3.919           | 0.999           | 2.381              | 2.668            |
| 204744_s_at | IARS     | 0.916          | 3.359             | 3.871           | 0.988           | 1.146              | 1.474            |
| 202896_s_at | SIRPA    | 0.923          | 2.46              | 5.346           | 0.942           | 2.969              | 3.466            |
| 200953_s_at | CCND2    | 1              | 2.691             | 5.648           | 0.94            | 2.627              | 4.476            |

|             |          |       |       |       |       |       |       |
|-------------|----------|-------|-------|-------|-------|-------|-------|
| 204847_at   | ZBTB11   | 0.782 | 2.815 | 3.26  | 0.849 | 0.788 | 0.981 |
| 205126_at   | VRK2     | 0.912 | 3.291 | 3.753 | 1     | 1.158 | 1.549 |
| 201954_at   | ARPC1B   | 0.576 | 1.573 | 3.033 | 0.996 | 1.55  | 1.661 |
| 212020_s_at | MKI67    | 0.814 | 2.498 | 3.734 | 0.996 | 0.407 | 0.857 |
| 216942_s_at | CD58     | 0.954 | 2.471 | 5.059 | 1     | 0.491 | 3.008 |
| 205861_at   | SPIB     | 0.768 | 2.286 | 3.367 | 0.98  | 1.568 | 2.633 |
| 200629_at   | WARS     | 1     | 3.051 | 4.271 | 0.992 | 1.796 | 2.386 |
| 203594_at   | RTCD1    | 0.847 | 2.665 | 3.443 | 0.986 | 0.774 | 0.716 |
| 201530_x_at | EIF4A1   | 0.889 | 2.437 | 4.081 | 0.993 | 1.173 | 1.371 |
| 214882_s_at | SFRS2    | 0.95  | 2.695 | 4.194 | 0.993 | 1.327 | 1.509 |
| 221485_at   | B4GALT5  | 0.849 | 2.256 | 3.881 | 0.995 | 2.073 | 2.608 |
| 208319_s_at | RBM3     | 0.965 | 2.722 | 4.14  | 0.885 | 0.944 | 1.129 |
| 201761_at   | MTHFD2   | 0.815 | 2.296 | 3.492 | 0.97  | 1.388 | 1.461 |
| 211575_s_at | UBE3A    | 0.99  | 3.38  | 3.435 | 0.974 | 0.775 | 0.952 |
| 217848_s_at | PPA1     | 0.803 | 2.17  | 3.464 | 0.992 | 1.289 | 1.779 |
| 207861_at   | CCL22    | 0.994 | 2.468 | 4.653 | 0.999 | 4.758 | 6.429 |
| 201586_s_at | SFPQ     | 0.756 | 2.552 | 2.573 | 0.999 | 1.885 | 2.167 |
| 200839_s_at | CTSB     | 0.954 | 3.261 | 3.167 | 1     | 0.722 | 0.723 |
| 200788_s_at | PEA15    | 0.998 | 2.434 | 4.594 | 0.999 | 2.494 | 3.888 |
| 202236_s_at | SLC16A1  | 0.929 | 3.245 | 2.937 | 0.967 | 0.882 | 1.186 |
| 202963_at   | RFX5     | 0.782 | 2.166 | 3.103 | 0.973 | 1.209 | 1.717 |
| 202270_at   | GBP1     | 0.999 | 2.664 | 4.074 | 0.533 | 1.695 | 1.953 |
| 208921_s_at | SRI      | 0.99  | 2.759 | 3.858 | 0.99  | 1.491 | 1.61  |
| 208852_s_at | CANX     | 0.71  | 1.756 | 3.085 | 0.992 | 0.573 | 1.034 |
| 203743_s_at | TDG      | 0.857 | 2.402 | 3.256 | 0.976 | 1.312 | 1.355 |
| 201129_at   | SFRS7    | 0.729 | 1.839 | 3.025 | 0.97  | 0.655 | 0.686 |
| 203927_at   | NFKBIE   | 0.971 | 2.637 | 3.69  | 0.996 | 1.294 | 1.77  |
| 206976_s_at | HSPH1    | 0.846 | 2.283 | 3.209 | 0.861 | 1.221 | 1.454 |
| 202591_s_at | SSBP1    | 0.92  | 2.246 | 3.788 | 1     | 0.873 | 1.278 |
| 201013_s_at | PAICS    | 0.965 | 2.482 | 3.722 | 0.987 | 1.438 | 1.685 |
| 218319_at   | PELI1    | 0.844 | 2.586 | 2.715 | 0.992 | 0.924 | 1.284 |
| 203723_at   | ITPKB    | 0.712 | 1.898 | 2.59  | 0.998 | 1.542 | 1.802 |
| 200609_s_at | WDR1     | 0.941 | 2.504 | 3.38  | 0.992 | 0.962 | 1.259 |
| 201304_at   | NDUFA5   | 0.985 | 2.181 | 4.243 | 0.984 | 1.119 | 0.836 |
| 201532_at   | PSMA3    | 0.88  | 2.211 | 3.208 | 0.999 | 1.107 | 1.213 |
| 220147_s_at | FAM60A   | 0.848 | 2.076 | 3.096 | 0.961 | 0.83  | 1.603 |
| 218239_s_at | GTPBP4   | 0.961 | 2.372 | 3.398 | 0.983 | 1.938 | 1.707 |
| 209486_at   | SAS10    | 0.965 | 2.918 | 2.776 | 1     | 0.842 | 1.005 |
| 206989_s_at | SFRS2IP  | 0.9   | 2.059 | 3.415 | 0.992 | 0.953 | 0.708 |
| 210538_s_at | BIRC3    | 0.999 | 2     | 4.317 | 0.991 | 1.427 | 3.341 |
| 202314_at   | CYP51A1  | 0.996 | 2.778 | 3.06  | 0.908 | 1.131 | 1.111 |
| 205263_at   | BCL10    | 0.998 | 2.662 | 3.2   | 0.989 | 1.352 | 1.624 |
| 206181_at   | SLAMF1   | 0.998 | 2.431 | 3.417 | 0.993 | 1.386 | 2.738 |
| 201251_at   | PKM2     | 0.968 | 2.517 | 3.075 | 1     | 1.204 | 2.098 |
| 200650_s_at | LDHA     | 0.906 | 2.09  | 3.209 | 0.983 | 1.101 | 1.426 |
| 204369_at   | PIK3CA   | 0.841 | 2.21  | 2.607 | 0.98  | 0.491 | 1.11  |
| 218236_s_at | PRKD3    | 0.883 | 2.634 | 2.401 | 0.995 | 1.433 | 1.238 |
| 218205_s_at | MKNK2    | 0.993 | 2.251 | 3.534 | 0.999 | 0.894 | 1.446 |
| 204331_s_at | MRPS12   | 0.977 | 2.215 | 3.441 | 0.994 | 1.003 | 1.677 |
| 212671_s_at | HLA-DQA1 | 0.889 | 1.973 | 3.123 | 0.99  | 0.833 | 1.834 |
| 200984_s_at | CD59     | 0.999 | 2.176 | 3.568 | 0.994 | 1.391 | 1.202 |

|             |          |       |       |       |       |       |       |
|-------------|----------|-------|-------|-------|-------|-------|-------|
| 200750_s_at | RAN      | 0.897 | 2.046 | 3.02  | 0.997 | 1.003 | 1.492 |
| 218237_s_at | SLC38A1  | 0.989 | 2.197 | 3.362 | 0.985 | 0.841 | 1.669 |
| 208905_at   | CYCS     | 0.916 | 2.171 | 2.917 | 0.996 | 1.093 | 1.198 |
| 203200_s_at | MTRR     | 0.902 | 2.254 | 2.718 | 0.993 | 0.777 | 1.14  |
| 200064_at   | HSP90AB1 | 0.967 | 2.29  | 3.055 | 0.999 | 1.268 | 1.72  |
| 201277_s_at | HNRPAB   | 0.973 | 1.89  | 3.744 | 0.997 | 1.132 | 1.742 |
| 201231_s_at | ENO1     | 0.893 | 1.87  | 3.17  | 0.999 | 1.138 | 1.497 |
| 210378_s_at | SSNA1    | 0.999 | 2.388 | 3.089 | 0.999 | 1.349 | 1.338 |
| 208821_at   | SNRPB    | 0.899 | 2.075 | 2.835 | 0.988 | 0.879 | 1.016 |
| 202428_x_at | DBI      | 0.962 | 2.059 | 3.261 | 0.942 | 1.214 | 1.907 |
| 218435_at   | DNAJC15  | 0.912 | 2.088 | 2.886 | 0.995 | 1.297 | 1.072 |
| 203880_at   | COX17    | 0.941 | 2.357 | 2.721 | 0.984 | 1.265 | 1.585 |
| 200691_s_at | HSPA9B   | 0.969 | 2.452 | 2.766 | 0.999 | 1.32  | 1.326 |
| 203156_at   | AKAP11   | 0.957 | 2.322 | 2.841 | 0.998 | 0.901 | 0.906 |
| 201388_at   | PSMD3    | 0.879 | 1.961 | 2.827 | 0.984 | 0.486 | 0.904 |
| 201422_at   | IFI30    | 0.978 | 2.726 | 2.516 | 0.984 | 1.049 | 1.568 |
| 214435_x_at | RALA     | 0.801 | 1.731 | 2.6   | 0.981 | 1.017 | 0.569 |
| 204767_s_at | FEN1     | 0.961 | 2.206 | 2.91  | 0.992 | 1.332 | 0.963 |
| 211969_at   | HSP90AA1 | 0.912 | 2.065 | 2.799 | 0.993 | 0.878 | 1.274 |
| 214214_s_at | C1QBP    | 0.86  | 1.889 | 2.697 | 0.941 | 1.034 | 1.116 |
| 201327_s_at | CCT6A    | 0.89  | 1.931 | 2.825 | 0.991 | 1.282 | 1.285 |
| 208828_at   | POLE3    | 0.786 | 1.599 | 2.65  | 0.997 | 0.652 | 0.947 |
| 209860_s_at | ANXA7    | 0.979 | 1.966 | 3.317 | 0.961 | 1.385 | 2.116 |
| 200634_at   | PFN1     | 0.971 | 2.173 | 2.936 | 1     | 1.035 | 1.534 |
| 208949_s_at | LGALS3   | 0.931 | 1.832 | 3.171 | 0.948 | 1.274 | 1.118 |
| 208724_s_at | RAB1A    | 0.906 | 2.217 | 2.479 | 0.996 | 0.779 | 0.776 |
| 202295_s_at | CTSH     | 0.994 | 2.191 | 3.009 | 0.999 | 1.63  | 1.818 |
| 201584_s_at | DDX39    | 0.97  | 2.111 | 2.965 | 0.995 | 0.8   | 1.326 |
| 35150_at    | CD40     | 0.902 | 1.679 | 3.219 | 0.997 | 0.899 | 1.866 |
| 200610_s_at | NCL      | 0.999 | 2.005 | 3.301 | 0.997 | 1.037 | 1.689 |
| 208152_s_at | DDX21    | 0.987 | 1.882 | 3.423 | 1     | 1.091 | 1.505 |
| 201892_s_at | IMPDH2   | 0.989 | 2.012 | 3.196 | 0.974 | 1.593 | 2.23  |
| 202088_at   | SLC39A6  | 0.913 | 2.433 | 2.25  | 0.976 | 1.493 | 1.389 |
| 211926_s_at | MYH9     | 0.995 | 2.091 | 3.105 | 0.988 | 0.587 | 1.254 |
| 217850_at   | GNL3     | 0.959 | 1.849 | 3.253 | 0.999 | 1.126 | 1.119 |
| 204897_at   | PTGER4   | 0.872 | 1.615 | 3.058 | 0.998 | 0.984 | 1.124 |
| 204780_s_at | FAS      | 0.994 | 2.111 | 3.039 | 0.99  | 2.013 | 2.815 |
| 209187_at   | DR1      | 0.92  | 2.19  | 2.503 | 0.671 | 0.879 | 0.646 |
| 217985_s_at | BAZ1A    | 0.933 | 2.013 | 2.798 | 0.979 | 0.724 | 0.77  |
| 201887_at   | IL13RA1  | 0.987 | 1.707 | 3.649 | 0.999 | 2.865 | 3.772 |
| 208638_at   | PDIA6    | 0.931 | 1.911 | 2.867 | 0.995 | 1.176 | 1.071 |
| 212955_s_at | RPSA     | 0.941 | 2.158 | 2.593 | 0.995 | 1.397 | 1.618 |
| 209316_s_at | HBS1L    | 0.906 | 2.083 | 2.489 | 0.993 | 0.823 | 0.944 |
| 201252_at   | PSMC4    | 1     | 2.094 | 3.01  | 0.968 | 0.911 | 1.447 |
| 35265_at    | FXR2     | 0.923 | 2.431 | 2.204 | 1     | 0.838 | 0.902 |
| 200079_s_at | KARS     | 0.909 | 1.902 | 2.722 | 1     | 0.797 | 1.113 |
| 203879_at   | PIK3CD   | 0.978 | 2.046 | 2.928 | 0.995 | 0.936 | 1.336 |
| 218576_s_at | DUSP12   | 0.998 | 2.54  | 2.452 | 0.994 | 0.754 | 0.988 |
| 201263_at   | TARS     | 0.996 | 2.066 | 2.997 | 0.998 | 1.749 | 2.398 |
| 200072_s_at | HNRPM    | 0.951 | 2.102 | 2.684 | 0.999 | 1.107 | 1.534 |
| 208863_s_at | SFRS1    | 0.98  | 1.842 | 3.246 | 0.974 | 0.911 | 1.452 |

|             |           |       |       |       |       |       |       |
|-------------|-----------|-------|-------|-------|-------|-------|-------|
| 218626_at   | EIF4ENIF1 | 0.865 | 2.033 | 2.291 | 0.996 | 0.699 | 0.96  |
| 201491_at   | AHSA1     | 0.983 | 2.111 | 2.845 | 0.994 | 1.011 | 1.078 |
| 201980_s_at | RSU1      | 0.898 | 2.141 | 2.323 | 1     | 1.932 | 1.274 |
| 1053_at     | RFC2      | 0.996 | 2.178 | 2.795 | 0.997 | 1.672 | 2.304 |
| 200807_s_at | HSPD1     | 0.944 | 1.953 | 2.796 | 0.991 | 1.446 | 1.444 |
| 201317_s_at | PSMA2     | 0.936 | 2.322 | 2.302 | 0.995 | 0.948 | 1.977 |
| 200006_at   | PARK7     | 0.969 | 1.935 | 2.952 | 0.992 | 1.124 | 1.298 |
| 218699_at   | RAB7L1    | 1     | 1.906 | 3.171 | 0.999 | 1.486 | 1.833 |
| 208726_s_at | EIF2S2    | 0.948 | 1.858 | 2.908 | 0.992 | 0.883 | 1.391 |
| 200877_at   | CCT4      | 0.976 | 2.091 | 2.735 | 0.983 | 0.965 | 1.073 |
| 208097_s_at | TXNDC     | 0.912 | 1.829 | 2.72  | 0.997 | 0.604 | 1.135 |
| 208985_s_at | EIF3S1    | 0.852 | 1.668 | 2.598 | 0.996 | 0.847 | 0.924 |
| 201079_at   | SYNGR2    | 0.94  | 2.07  | 2.54  | 0.993 | 1.849 | 2.121 |
| 201760_s_at | WSB2      | 0.998 | 2.104 | 2.814 | 0.995 | 0.978 | 1.169 |
| 201687_s_at | API5      | 1     | 1.832 | 3.243 | 0.997 | 0.94  | 0.637 |
| 200996_at   | ACTR3     | 0.913 | 1.915 | 2.586 | 0.958 | 1.075 | 0.933 |
| 208680_at   | PRDX1     | 0.887 | 1.804 | 2.583 | 0.999 | 1.005 | 1.345 |
| 201274_at   | PSMA5     | 0.989 | 1.977 | 2.905 | 0.978 | 1.174 | 1.498 |
| 202589_at   | TYMS      | 0.944 | 1.988 | 2.628 | 0.991 | 1.889 | 1.217 |
| 200627_at   | PTGES3    | 0.935 | 1.794 | 2.856 | 1     | 0.866 | 1.055 |
| 200060_s_at | RNPS1     | 0.954 | 1.868 | 2.846 | 0.991 | 1.231 | 1.011 |
| 202690_s_at | SNRPD1    | 1     | 2.326 | 2.508 | 0.929 | 1.608 | 1.673 |
| 202670_at   | MAP2K1    | 0.944 | 1.767 | 2.935 | 0.97  | 0.933 | 1.12  |
| 201756_at   | RPA2      | 0.966 | 2     | 2.698 | 0.963 | 0.767 | 0.855 |
| 217973_at   | DCXR      | 0.901 | 1.976 | 2.375 | 0.971 | 1.335 | 1.244 |
| 201170_s_at | BHLHB2    | 0.982 | 1.852 | 2.987 | 0.998 | 0.928 | 1.358 |
| 202939_at   | ZMPSTE24  | 0.978 | 2.14  | 2.55  | 0.988 | 0.667 | 0.691 |
| 209511_at   | POLR2F    | 0.982 | 2.07  | 2.649 | 1     | 0.77  | 1.418 |
| 200599_s_at | HSP90B1   | 0.997 | 1.621 | 3.483 | 0.88  | 0.852 | 0.84  |
| 209384_at   | PROSC     | 0.957 | 2.068 | 2.513 | 0.989 | 0.835 | 1.154 |
| 208598_s_at | HUWE1     | 0.994 | 1.858 | 3.006 | 0.999 | 1.149 | 2.16  |
| 201479_at   | DKC1      | 0.999 | 2.027 | 2.776 | 0.996 | 1.426 | 1.442 |
| 205961_s_at | PSIP1     | 0.924 | 1.86  | 2.588 | 0.986 | 0.57  | 0.743 |
| 208628_s_at | YBX1      | 0.956 | 1.846 | 2.769 | 0.997 | 0.97  | 1.368 |
| 203338_at   | PPP2R5E   | 0.981 | 2.121 | 2.521 | 1     | 0.724 | 0.72  |
| 203923_s_at | CYBB      | 1     | 2.003 | 2.748 | 0.952 | 1.024 | 0.77  |
| 201400_at   | PSMB3     | 0.95  | 1.928 | 2.576 | 0.998 | 1.173 | 1.258 |
| 208743_s_at | YWHAB     | 0.981 | 1.856 | 2.852 | 1     | 0.607 | 0.83  |
| 201563_at   | SORD      | 1     | 2.437 | 2.255 | 0.943 | 2.007 | 0.933 |
| 212063_at   | CD44      | 0.984 | 1.767 | 3.01  | 1     | 0.689 | 1.172 |
| 200790_at   | ODC1      | 0.883 | 1.913 | 2.236 | 0.999 | 1.149 | 1.034 |
| 207707_s_at | SEC13L1   | 0.914 | 1.87  | 2.449 | 0.996 | 0.988 | 1.129 |
| 202329_at   | CSK       | 0.962 | 2.145 | 2.365 | 0.972 | 1.027 | 0.869 |
| 214864_s_at | GRHPR     | 0.909 | 1.919 | 2.354 | 0.968 | 1.768 | 2.029 |
| 203359_s_at | MYCBP     | 0.999 | 1.807 | 3.017 | 0.999 | 0.432 | 1.048 |
| 218092_s_at | HRB       | 0.996 | 2.187 | 2.473 | 0.974 | 1.149 | 1.216 |
| 202268_s_at | APPBP1    | 0.994 | 1.819 | 2.949 | 0.999 | 0.702 | 0.783 |
| 201202_at   | PCNA      | 0.983 | 1.842 | 2.843 | 0.991 | 1.247 | 1.147 |
| 214268_s_at | MTMR4     | 0.983 | 1.802 | 2.902 | 1     | 1.355 | 1.947 |
| 208775_at   | XPO1      | 0.941 | 1.788 | 2.659 | 1     | 1.056 | 1.142 |
| 200595_s_at | EIF3S10   | 0.999 | 1.82  | 2.935 | 0.995 | 1.455 | 1.212 |

|             |           |       |       |       |       |       |       |
|-------------|-----------|-------|-------|-------|-------|-------|-------|
| 201533_at   | CTNNB1    | 0.979 | 2.12  | 2.419 | 0.966 | 1.313 | 1.258 |
| 201201_at   | CSTB      | 0.917 | 1.806 | 2.49  | 0.981 | 0.856 | 1.058 |
| 204116_at   | IL2RG     | 0.999 | 1.892 | 2.802 | 1     | 1.347 | 2.418 |
| 205133_s_at | HSPE1     | 0.998 | 2.007 | 2.618 | 0.991 | 1.246 | 1.345 |
| 200644_at   | MARCKSL1  | 0.896 | 1.915 | 2.211 | 0.998 | 1.034 | 1.167 |
| 202484_s_at | MBD2      | 0.99  | 2.093 | 2.467 | 0.997 | 0.569 | 0.91  |
| 201503_at   | G3BP      | 0.985 | 1.692 | 3.017 | 0.942 | 1.301 | 1.104 |
| 218150_at   | ARL5A     | 0.942 | 1.691 | 2.757 | 0.999 | 0.85  | 0.704 |
| 217915_s_at | C15orf15  | 0.991 | 1.667 | 3.092 | 0.986 | 0.604 | 1.008 |
| 200910_at   | CCT3      | 0.941 | 1.88  | 2.472 | 0.948 | 1.337 | 1.535 |
| 200812_at   | CCT7      | 0.949 | 1.901 | 2.485 | 0.995 | 0.981 | 1.429 |
| 201899_s_at | UBE2A     | 0.956 | 1.809 | 2.648 | 1     | 1.141 | 1.201 |
| 200902_at   | Sep-15    | 0.999 | 2.046 | 2.556 | 0.978 | 0.763 | 0.838 |
| 201726_at   | ELAVL1    | 0.954 | 1.799 | 2.649 | 1     | 0.815 | 0.948 |
| 219212_at   | HSPA14    | 0.889 | 1.948 | 2.121 | 0.997 | 0.949 | 1.741 |
| 217812_at   | YTHDF2    | 0.878 | 1.504 | 2.678 | 0.998 | 0.973 | 0.893 |
| 218467_at   | TNFSF5IP1 | 0.884 | 1.691 | 2.407 | 0.998 | 0.789 | 0.862 |
| 203893_at   | TAF9      | 0.997 | 1.719 | 3.01  | 0.993 | 1.675 | 2.129 |
| 202697_at   | NUDT21    | 0.883 | 1.885 | 2.135 | 0.996 | 0.978 | 0.982 |
| 201241_at   | DDX1      | 0.894 | 1.747 | 2.361 | 0.994 | 0.987 | 0.96  |
| M10098_3_at | ---       | 0.974 | 0.46  | 0.4   | 0.992 | 2.907 | 2.746 |
| 201023_at   | TAF7      | 0.911 | 1.993 | 2.14  | 1     | 0.859 | 1.238 |
| 200046_at   | DAD1      | 0.961 | 1.586 | 2.989 | 0.999 | 1.372 | 1.652 |
| 208758_at   | ATIC      | 0.979 | 1.919 | 2.551 | 0.998 | 1.2   | 1.016 |
| 201142_at   | EIF2S1    | 0.997 | 1.984 | 2.552 | 1     | 0.943 | 1.328 |
| 203832_at   | SNRPF     | 0.918 | 1.944 | 2.199 | 0.991 | 1.425 | 1.768 |
| 205335_s_at | SRP19     | 0.909 | 1.912 | 2.189 | 0.967 | 0.953 | 1.126 |
| 200911_s_at | TACC1     | 0.951 | 1.878 | 2.434 | 0.998 | 0.861 | 1.062 |
| 203396_at   | PSMA4     | 0.971 | 1.97  | 2.398 | 1     | 1.11  | 1.205 |
| 202306_at   | POLR2G    | 0.961 | 1.829 | 2.527 | 1     | 0.984 | 0.825 |
| 211152_s_at | HTRA2     | 0.997 | 1.766 | 2.811 | 0.996 | 1.122 | 1.432 |
| 213465_s_at | PPP1R7    | 0.975 | 1.9   | 2.495 | 1     | 1.062 | 1.321 |
| 217887_s_at | EPS15     | 0.927 | 1.719 | 2.491 | 0.938 | 1.193 | 0.894 |
| 204404_at   | SLC12A2   | 0.932 | 2.405 | 1.793 | 0.998 | 1.397 | 1.502 |
| 200005_at   | EIF3S7    | 0.905 | 1.685 | 2.403 | 0.989 | 0.835 | 1.134 |
| 201106_at   | GPX4      | 0.954 | 1.734 | 2.575 | 0.997 | 1.06  | 1.25  |
| 201587_s_at | IRAK1     | 0.989 | 1.707 | 2.797 | 0.993 | 1.185 | 1.176 |
| 214427_at   | NOL1      | 0.886 | 1.859 | 2.047 | 1     | 1.28  | 1.429 |
| 208909_at   | UQCRRFS1  | 0.902 | 1.709 | 2.295 | 0.999 | 1.081 | 1.071 |
| 209239_at   | NFKB1     | 0.989 | 1.68  | 2.799 | 0.993 | 1.198 | 2.293 |
| 202282_at   | HADH2     | 0.997 | 2.023 | 2.36  | 0.992 | 0.883 | 0.91  |
| 201498_at   | USP7      | 0.871 | 1.825 | 1.99  | 1     | 1.119 | 0.978 |
| 204949_at   | ICAM3     | 0.998 | 1.784 | 2.67  | 0.996 | 0.91  | 1.172 |
| 204777_s_at | MAL       | 0.995 | 1.539 | 3.071 | 0.944 | 1.068 | 1.27  |
| 208986_at   | TCF12     | 0.972 | 2.022 | 2.227 | 0.981 | 0.686 | 1.068 |
| 200052_s_at | ILF2      | 0.98  | 1.829 | 2.496 | 0.998 | 1.028 | 1.113 |
| 216250_s_at | LPXN      | 0.919 | 1.852 | 2.164 | 0.99  | 0.808 | 1.05  |
| 202362_at   | RAP1A     | 0.956 | 1.712 | 2.494 | 0.978 | 1.098 | 1.23  |
| 200631_s_at | SET       | 0.93  | 1.733 | 2.322 | 0.998 | 0.983 | 1.109 |
| 221776_s_at | BRD7      | 0.978 | 1.851 | 2.396 | 0.986 | 1.138 | 1.175 |
| 207157_s_at | GNG5      | 0.938 | 1.655 | 2.464 | 0.989 | 0.76  | 0.829 |

|             |          |       |       |       |       |       |       |
|-------------|----------|-------|-------|-------|-------|-------|-------|
| 212320_at   | TUBB     | 0.911 | 1.519 | 2.528 | 0.966 | 1.386 | 1.537 |
| 210715_s_at | SPINT2   | 0.998 | 1.68  | 2.74  | 0.994 | 1.301 | 1.371 |
| 208881_x_at | IDI1     | 0.912 | 1.985 | 1.936 | 0.997 | 1.15  | 1.123 |
| 201097_s_at | ARF4     | 0.95  | 1.679 | 2.476 | 1     | 0.947 | 1.149 |
| 210125_s_at | BANF1    | 0.891 | 1.558 | 2.34  | 0.992 | 1.058 | 1.297 |
| 202678_at   | GTF2A2   | 0.999 | 1.861 | 2.449 | 0.993 | 0.938 | 0.983 |
| M10098_M_at | ---      | 0.978 | 0.474 | 0.442 | 1     | 3.497 | 3.264 |
| 216237_s_at | MCM5     | 0.925 | 1.745 | 2.236 | 1     | 0.681 | 0.909 |
| 211941_s_at | PEBP1    | 0.901 | 1.78  | 2.074 | 0.994 | 0.668 | 0.68  |
| 201653_at   | CNIH     | 0.933 | 1.887 | 2.093 | 0.997 | 1.443 | 1.248 |
| 215416_s_at | STOML2   | 0.99  | 1.705 | 2.606 | 0.987 | 1.266 | 1.483 |
| 204319_s_at | RGS10    | 0.999 | 1.776 | 2.542 | 0.998 | 0.613 | 0.836 |
| 213229_at   | DICER1   | 0.884 | 1.788 | 1.967 | 1     | 0.671 | 0.619 |
| 200030_s_at | SLC25A3  | 0.898 | 1.701 | 2.133 | 0.988 | 0.983 | 1.051 |
| 202567_at   | SNRPD3   | 0.883 | 2.024 | 1.733 | 0.987 | 1.054 | 1.02  |
| 217982_s_at | MORF4L1  | 0.868 | 1.506 | 2.243 | 0.987 | 0.851 | 0.921 |
| 211962_s_at | ZFP36L1  | 0.999 | 1.311 | 3.413 | 0.994 | 1.096 | 1.292 |
| 212048_s_at | YARS     | 0.957 | 1.818 | 2.239 | 0.991 | 1.221 | 1.821 |
| 201030_x_at | LDHB     | 0.977 | 1.874 | 2.256 | 1     | 1.092 | 1.154 |
| 201560_at   | CLIC4    | 1     | 1.903 | 2.326 | 0.999 | 0.726 | 0.93  |
| 200786_at   | PSMB7    | 0.981 | 1.712 | 2.478 | 0.987 | 0.977 | 1.09  |
| 201862_s_at | LRRFIP1  | 0.869 | 1.61  | 2.065 | 0.997 | 1.357 | 1.143 |
| 212455_at   | YTHDC1   | 0.884 | 1.715 | 2.002 | 0.944 | 0.75  | 0.65  |
| 206052_s_at | SLBP     | 0.936 | 1.709 | 2.25  | 1     | 0.932 | 1.428 |
| 202361_at   | SEC24C   | 0.925 | 1.612 | 2.326 | 0.997 | 0.876 | 0.94  |
| 201518_at   | CBX1     | 0.943 | 1.712 | 2.272 | 0.971 | 1.073 | 1.761 |
| 200873_s_at | CCT8     | 0.993 | 1.763 | 2.441 | 1     | 1.276 | 1.262 |
| 200058_s_at | ASCC3L1  | 0.896 | 1.718 | 2.036 | 0.999 | 0.771 | 0.928 |
| 208642_s_at | XRCC5    | 0.958 | 1.745 | 2.29  | 0.994 | 0.867 | 1.133 |
| 200901_s_at | M6PR     | 0.986 | 1.832 | 2.309 | 0.996 | 0.829 | 1.218 |
| 200840_at   | KARS     | 0.971 | 1.753 | 2.339 | 0.998 | 1.409 | 1.417 |
| 201390_s_at | CSNK2B   | 0.889 | 1.598 | 2.144 | 0.999 | 0.743 | 1.25  |
| 210759_s_at | PSMA1    | 0.956 | 1.632 | 2.421 | 0.995 | 0.939 | 1.182 |
| 202854_at   | HPRT1    | 0.902 | 1.48  | 2.374 | 0.999 | 1.209 | 1.424 |
| 201176_s_at | ARCN1    | 0.944 | 1.531 | 2.513 | 0.997 | 0.847 | 1.016 |
| 212600_s_at | UQCRC2   | 0.897 | 1.593 | 2.179 | 0.993 | 0.951 | 0.874 |
| 201113_at   | TUFM     | 0.958 | 1.637 | 2.411 | 0.999 | 1.132 | 1.426 |
| 205047_s_at | ASNS     | 1     | 1.738 | 2.473 | 0.999 | 1.066 | 1.883 |
| 201051_at   | ANP32A   | 0.976 | 1.599 | 2.555 | 0.989 | 0.865 | 1.124 |
| 218042_at   | COPS4    | 0.989 | 1.809 | 2.314 | 0.998 | 0.8   | 0.872 |
| 217791_s_at | ALDH18A1 | 0.963 | 1.749 | 2.267 | 0.987 | 0.58  | 0.832 |
| 203579_s_at | SLC7A6   | 0.961 | 2.319 | 1.702 | 0.99  | 0.841 | 0.89  |
| 210532_s_at | C14orf2  | 0.998 | 1.725 | 2.466 | 0.998 | 1.127 | 1.181 |
| 203053_at   | BCAS2    | 0.884 | 1.552 | 2.147 | 0.983 | 0.946 | 0.89  |
| 202522_at   | PITPNB   | 0.992 | 1.666 | 2.515 | 0.997 | 1.135 | 1.2   |
| 217933_s_at | LAP3     | 0.873 | 1.731 | 1.872 | 0.988 | 0.863 | 0.954 |
| 202706_s_at | UMPS     | 1     | 1.933 | 2.195 | 1     | 1.583 | 1.225 |
| 200893_at   | SFRS10   | 0.998 | 1.596 | 2.645 | 1     | 1.185 | 1.33  |
| 202138_x_at | JTV1     | 0.999 | 1.795 | 2.352 | 0.952 | 1.059 | 1.41  |
| 200670_at   | XBP1     | 0.996 | 1.699 | 2.469 | 1     | 0.655 | 0.802 |
| 202930_s_at | SUCLA2   | 0.99  | 2.265 | 1.829 | 0.951 | 1.302 | 1.013 |

|             |         |       |       |       |       |       |       |
|-------------|---------|-------|-------|-------|-------|-------|-------|
| 201180_s_at | GNAI3   | 0.927 | 1.717 | 2.111 | 0.997 | 1.254 | 1.219 |
| 206621_s_at | WBSCR1  | 0.909 | 1.639 | 2.126 | 0.972 | 0.882 | 0.882 |
| 201222_s_at | RAD23B  | 0.999 | 1.864 | 2.256 | 0.981 | 1.108 | 1.349 |
| 212952_at   | ---     | 0.994 | 1.898 | 2.192 | 0.997 | 1.375 | 1.781 |
| 201930_at   | MCM6    | 0.915 | 1.823 | 1.914 | 0.992 | 0.979 | 0.839 |
| 209083_at   | CORO1A  | 0.951 | 1.53  | 2.456 | 1     | 1.1   | 1.468 |
| 200703_at   | DYNLL1  | 0.895 | 1.587 | 2.097 | 0.91  | 0.838 | 0.827 |
| 218826_at   | SLC35F2 | 0.999 | 1.693 | 2.448 | 0.841 | 2.225 | 1.681 |
| 202836_s_at | TXNL4A  | 0.99  | 1.746 | 2.327 | 0.987 | 1.174 | 1.176 |
| 218059_at   | ZNF706  | 1     | 1.571 | 2.637 | 0.999 | 0.573 | 0.915 |
| 205644_s_at | SNRPG   | 0.924 | 1.489 | 2.374 | 0.984 | 1.346 | 1.266 |
| 203185_at   | RASSF2  | 0.987 | 1.745 | 2.311 | 0.999 | 1.086 | 1.569 |
| 209944_at   | ZNF410  | 0.967 | 1.846 | 2.093 | 0.993 | 0.717 | 0.739 |
| 202680_at   | GTF2E2  | 0.998 | 1.901 | 2.159 | 0.999 | 1.111 | 0.893 |
| 219485_s_at | PSMD10  | 0.988 | 2.015 | 1.996 | 1     | 0.947 | 0.796 |
| 207339_s_at | LTB     | 0.957 | 1.686 | 2.235 | 0.999 | 3.051 | 4.995 |
| 212519_at   | UBE2E1  | 0.995 | 1.778 | 2.291 | 0.996 | 0.643 | 1.022 |
| 200937_s_at | RPL5    | 0.905 | 1.509 | 2.231 | 0.99  | 0.818 | 1.032 |
| 200818_at   | ATP5O   | 0.87  | 1.562 | 1.991 | 0.994 | 1.066 | 1.132 |
| 214594_x_at | ATP8B1  | 0.997 | 1.829 | 2.231 | 0.954 | 1.327 | 0.861 |
| 200059_s_at | RHOA    | 0.904 | 1.577 | 2.118 | 0.993 | 0.929 | 1.131 |
| 200043_at   | ERH     | 0.898 | 1.606 | 2.049 | 1     | 1.057 | 1.124 |
| 204228_at   | PPIH    | 0.904 | 1.494 | 2.229 | 1     | 0.848 | 0.962 |
| 200709_at   | FKBP1A  | 0.943 | 1.546 | 2.338 | 0.998 | 0.818 | 1.125 |
| 201092_at   | RBBP7   | 0.899 | 1.662 | 1.974 | 0.998 | 0.864 | 0.932 |
| 213757_at   | EIF5A   | 0.989 | 1.774 | 2.234 | 1     | 1.607 | 2.523 |
| 207574_s_at | GADD45B | 0.999 | 1.713 | 2.352 | 0.975 | 1.543 | 1.125 |
| 200093_s_at | HINT1   | 0.968 | 1.654 | 2.281 | 1     | 1.022 | 1.195 |
| 205419_at   | EBI2    | 0.962 | 1.304 | 2.857 | 0.996 | 0.929 | 1.098 |
| 219099_at   | C12orf5 | 0.945 | 1.677 | 2.135 | 0.978 | 1.318 | 1.546 |
| 201672_s_at | USP14   | 0.995 | 1.722 | 2.301 | 0.999 | 0.969 | 1.141 |
| 200068_s_at | CANX    | 0.924 | 1.424 | 2.396 | 1     | 0.711 | 1.008 |
| 203964_at   | NMI     | 0.93  | 1.609 | 2.146 | 0.983 | 0.821 | 0.931 |
| 209452_s_at | VTI1B   | 0.905 | 1.364 | 2.397 | 0.994 | 0.894 | 0.95  |
| 200021_at   | CFL1    | 0.983 | 1.736 | 2.218 | 0.875 | 1.363 | 1.057 |
| 201682_at   | PMPCB   | 0.998 | 1.735 | 2.286 | 0.998 | 1.194 | 1.064 |
| 208697_s_at | EIF3S6  | 0.958 | 1.635 | 2.235 | 0.999 | 0.843 | 1.121 |
| 209218_at   | SQLE    | 0.987 | 1.695 | 2.285 | 0.982 | 1.28  | 1.821 |
| 213762_x_at | RBMX    | 0.913 | 1.831 | 1.809 | 0.998 | 1.401 | 1.387 |
| 200990_at   | TRIM28  | 0.968 | 1.436 | 2.584 | 0.991 | 0.743 | 0.993 |
| 212971_at   | CARS    | 0.95  | 1.453 | 2.459 | 0.998 | 1.128 | 1.32  |
| 218283_at   | SS18L2  | 0.958 | 1.638 | 2.218 | 0.975 | 0.966 | 0.922 |
| 202110_at   | COX7B   | 0.994 | 1.683 | 2.321 | 1     | 1.361 | 1.134 |
| 208845_at   | VDAC3   | 1     | 1.57  | 2.515 | 0.991 | 1.423 | 0.868 |
| 201273_s_at | SRP9    | 0.879 | 1.508 | 2.021 | 0.967 | 0.85  | 0.676 |
| 221654_s_at | USP3    | 0.956 | 1.766 | 2.032 | 0.999 | 0.696 | 0.75  |
| 202309_at   | MTHFD1  | 0.993 | 1.806 | 2.142 | 0.987 | 1.165 | 1.026 |
| 220068_at   | VPREB3  | 0.992 | 0.829 | 0.304 | 0.996 | 0.492 | 0.199 |
| 216194_s_at | CKAP1   | 0.958 | 1.849 | 1.935 | 0.97  | 1.025 | 1.167 |
| 200614_at   | CLTC    | 0.926 | 1.712 | 1.95  | 0.973 | 0.816 | 1.166 |
| 204857_at   | MAD1L1  | 0.938 | 1.437 | 2.379 | 0.999 | 0.649 | 0.58  |

|             |        |       |       |       |       |       |       |
|-------------|--------|-------|-------|-------|-------|-------|-------|
| 213738_s_at | ATP5A1 | 0.893 | 1.484 | 2.085 | 1     | 0.945 | 0.757 |
| 204175_at   | ZNF593 | 0.995 | 1.986 | 1.934 | 0.991 | 0.94  | 1.222 |
| 201472_at   | VBP1   | 0.976 | 1.536 | 2.397 | 0.999 | 0.899 | 0.908 |
| 202467_s_at | COPS2  | 0.943 | 1.569 | 2.182 | 0.972 | 0.914 | 0.924 |
| 210949_s_at | EIF3S8 | 0.919 | 1.65  | 1.968 | 0.997 | 0.81  | 1.282 |
| 218306_s_at | HERC1  | 0.994 | 1.751 | 2.165 | 0.933 | 0.683 | 0.923 |
| 209945_s_at | GSK3B  | 1     | 1.823 | 2.102 | 0.996 | 0.845 | 1.053 |
| 214512_s_at | SUB1   | 0.953 | 1.539 | 2.261 | 0.994 | 0.895 | 0.956 |
| 218336_at   | PFDN2  | 0.982 | 1.63  | 2.259 | 0.997 | 1.194 | 1.428 |
| 202228_s_at | NPTN   | 0.936 | 1.534 | 2.18  | 0.998 | 0.871 | 1.143 |
| 201516_at   | SRM    | 1     | 1.701 | 2.243 | 0.999 | 1.162 | 1.205 |
| 201351_s_at | YME1L1 | 0.994 | 1.692 | 2.217 | 1     | 0.873 | 1.003 |
| 201268_at   | NME2   | 0.949 | 1.56  | 2.184 | 0.953 | 1.074 | 1.065 |
| 217873_at   | CAB39  | 1     | 1.686 | 2.229 | 1     | 0.785 | 0.957 |
| 202081_at   | IER2   | 0.971 | 1.531 | 2.309 | 1     | 0.947 | 1.212 |
| 201991_s_at | KIF5B  | 0.972 | 1.664 | 2.127 | 0.995 | 0.662 | 0.994 |
| 200081_s_at | RPS6   | 0.915 | 1.573 | 1.993 | 0.998 | 0.927 | 1.096 |
| 212852_s_at | TROVE2 | 0.969 | 1.556 | 2.258 | 1     | 2.113 | 2.53  |
| 217923_at   | PEF1   | 0.949 | 1.475 | 2.282 | 1     | 0.797 | 1.188 |
| 218032_at   | SNN    | 0.977 | 1.519 | 2.345 | 0.984 | 0.856 | 1.27  |
| 204102_s_at | EEF2   | 0.969 | 1.4   | 2.501 | 0.992 | 0.678 | 0.907 |
| 201237_at   | CAPZA2 | 1     | 1.847 | 2.014 | 0.984 | 0.822 | 0.622 |
| 213535_s_at | UBE2I  | 0.931 | 1.681 | 1.917 | 0.99  | 0.941 | 1.155 |
| 203531_at   | CUL5   | 0.966 | 2.032 | 1.706 | 0.996 | 1.028 | 0.822 |
| 207176_s_at | CD80   | 0.991 | 1.653 | 2.207 | 0.999 | 0.999 | 1.27  |
| 221230_s_at | ARID4B | 0.947 | 2.057 | 1.618 | 0.963 | 0.907 | 0.792 |
| 208620_at   | PCBP1  | 0.993 | 1.581 | 2.313 | 1     | 0.711 | 1.219 |
| 209503_s_at | PSMC5  | 0.95  | 1.431 | 2.338 | 0.998 | 1.098 | 1.53  |
| 217822_at   | WBP11  | 0.954 | 1.624 | 2.075 | 0.996 | 1.01  | 0.757 |
| 214257_s_at | SEC22B | 0.998 | 1.845 | 1.997 | 0.963 | 0.976 | 0.851 |
| 201574_at   | ETF1   | 0.961 | 1.354 | 2.522 | 0.998 | 0.928 | 1.039 |
| 204559_s_at | LSM7   | 0.939 | 1.353 | 2.405 | 0.963 | 0.616 | 0.581 |
| 209199_s_at | MEF2C  | 0.938 | 1.526 | 2.125 | 0.994 | 1.059 | 1.313 |
| 208829_at   | TAPBP  | 0.98  | 1.631 | 2.17  | 0.999 | 1.392 | 1.712 |
| 221761_at   | ADSS   | 0.992 | 1.569 | 2.304 | 1     | 0.84  | 0.743 |
| 200925_at   | COX6A1 | 0.946 | 1.672 | 1.966 | 1     | 0.91  | 1.07  |
| 203316_s_at | SNRPE  | 0.961 | 1.464 | 2.317 | 0.996 | 1.251 | 1.148 |
| 218057_x_at | COX4NB | 0.986 | 1.64  | 2.177 | 0.982 | 0.875 | 1.194 |
| 200768_s_at | MAT2A  | 0.994 | 1.464 | 2.46  | 1     | 1.007 | 1.12  |
| 219371_s_at | KLF2   | 0.994 | 0.53  | 0.512 | 0.986 | 0.602 | 0.492 |
| 211963_s_at | ARPC5  | 0.926 | 1.718 | 1.815 | 0.998 | 0.711 | 0.907 |
| 201232_s_at | PSMD13 | 0.924 | 1.413 | 2.19  | 0.998 | 1.078 | 1.399 |
| 202042_at   | HARS   | 0.926 | 1.475 | 2.103 | 0.987 | 0.719 | 1.042 |
| 200608_s_at | RAD21  | 0.881 | 1.393 | 2.011 | 0.979 | 1.073 | 0.631 |
| 204446_s_at | ALOX5  | 0.997 | 0.568 | 0.485 | 0.999 | 0.705 | 0.48  |
| 202298_at   | NDUFA1 | 0.957 | 1.568 | 2.1   | 0.908 | 0.96  | 0.898 |
| 200668_s_at | UBE2D3 | 0.926 | 1.525 | 2.02  | 1     | 0.829 | 1.035 |
| 210907_s_at | PDCD10 | 0.928 | 1.621 | 1.908 | 0.995 | 1.053 | 0.83  |
| 208761_s_at | SUMO1  | 0.998 | 1.585 | 2.253 | 0.998 | 0.665 | 0.985 |
| 205055_at   | ITGAE  | 0.902 | 1.517 | 1.919 | 0.967 | 0.977 | 0.696 |
| 200968_s_at | PPIB   | 0.952 | 1.533 | 2.112 | 1     | 0.636 | 0.991 |



|             |          |       |       |       |       |       |       |
|-------------|----------|-------|-------|-------|-------|-------|-------|
| 202673_at   | DPM1     | 0.953 | 1.515 | 2.137 | 0.998 | 1.139 | 0.936 |
| 204759_at   | RCBTB2   | 0.997 | 1.744 | 2.028 | 0.947 | 1.648 | 0.912 |
| 204026_s_at | ZWINT    | 0.99  | 1.563 | 2.23  | 0.948 | 1.214 | 0.921 |
| 218544_s_at | RCL1     | 0.988 | 1.691 | 2.051 | 0.994 | 0.919 | 1.435 |
| 204881_s_at | UGCG     | 0.98  | 1.551 | 2.2   | 0.976 | 1.091 | 1.625 |
| 207507_s_at | ATP5G3   | 0.896 | 1.47  | 1.939 | 0.995 | 1.142 | 0.86  |
| 208714_at   | NDUFV1   | 0.999 | 1.582 | 2.239 | 0.997 | 1.271 | 1.23  |
| 202779_s_at | UBE2S    | 0.95  | 1.699 | 1.878 | 0.963 | 1.804 | 1.744 |
| 218350_s_at | GMNN     | 0.949 | 1.616 | 1.97  | 0.989 | 1.399 | 0.999 |
| 200876_s_at | PSMB1    | 0.877 | 1.351 | 2.011 | 1     | 1.018 | 1.261 |
| 200065_s_at | ARF1     | 0.915 | 1.384 | 2.134 | 0.999 | 0.713 | 0.905 |
| 217957_at   | C16orf80 | 0.951 | 1.511 | 2.107 | 1     | 0.97  | 1.068 |
| 214709_s_at | KTN1     | 0.991 | 1.711 | 2.015 | 0.995 | 1.246 | 1.085 |
| 208799_at   | PSMB5    | 0.991 | 1.385 | 2.483 | 1     | 1.213 | 1.309 |
| 201146_at   | NFE2L2   | 0.992 | 1.639 | 2.101 | 0.96  | 0.924 | 1.43  |
| 201528_at   | RPA1     | 0.929 | 1.644 | 1.836 | 0.998 | 0.913 | 0.872 |
| 208720_s_at | RBM39    | 1     | 1.6   | 2.183 | 1     | 0.543 | 0.922 |
| 201020_at   | YWHAH    | 0.96  | 1.586 | 2.029 | 1     | 1.133 | 1.865 |
| 208649_s_at | VCP      | 0.931 | 1.409 | 2.142 | 0.997 | 0.625 | 1.873 |
| 214167_s_at | RPLP0    | 0.938 | 1.574 | 1.946 | 0.999 | 0.701 | 1.087 |
| 213671_s_at | MARS     | 0.997 | 1.417 | 2.442 | 0.987 | 1.099 | 1.626 |
| 208836_at   | ATP1B3   | 0.998 | 1.526 | 2.271 | 0.992 | 1.216 | 1.107 |
| 217773_s_at | NDUFA4   | 0.942 | 1.624 | 1.898 | 0.999 | 1.114 | 1.033 |
| 208777_s_at | PSMD11   | 0.945 | 1.486 | 2.087 | 1     | 0.885 | 1.494 |
| 217871_s_at | MIF      | 0.969 | 1.536 | 2.12  | 0.994 | 0.82  | 0.976 |
| 200042_at   | C22orf28 | 0.99  | 1.54  | 2.196 | 0.94  | 0.652 | 1.101 |
| 200903_s_at | AHCY     | 0.933 | 1.249 | 2.397 | 0.991 | 1.467 | 1.379 |
| 202020_s_at | LANCL1   | 0.983 | 1.49  | 2.227 | 0.998 | 0.757 | 0.643 |
| 200705_s_at | EEF1B2   | 0.993 | 1.575 | 2.141 | 0.992 | 0.824 | 0.957 |
| 201275_at   | FDPS     | 0.998 | 1.411 | 2.408 | 0.994 | 1.457 | 1.786 |
| 208652_at   | PPP2CA   | 0.92  | 1.505 | 1.913 | 0.998 | 0.681 | 0.803 |
| M27830_M_at | ---      | 1     | 0.627 | 0.469 | 0.985 | 0.942 | 0.811 |
| 204050_s_at | CLTA     | 0.982 | 1.659 | 1.975 | 0.999 | 1.025 | 1.174 |
| 209036_s_at | MDH2     | 0.964 | 1.685 | 1.867 | 1     | 1.016 | 1.083 |
| 202880_s_at | PSCD1    | 0.986 | 1.532 | 2.132 | 1     | 1.577 | 1.423 |
| 217860_at   | NDUFA10  | 0.87  | 1.213 | 2.096 | 0.998 | 0.715 | 0.896 |
| 200036_s_at | RPL10A   | 0.949 | 1.491 | 2.028 | 0.997 | 0.882 | 1.04  |
| 203320_at   | SH2B3    | 0.985 | 1.615 | 2.012 | 0.956 | 1.542 | 1.364 |
| 202502_at   | ACADM    | 0.901 | 1.381 | 1.968 | 0.989 | 1.12  | 0.977 |
| 201568_at   | UQCRCQ   | 0.993 | 1.602 | 2.06  | 0.998 | 1.148 | 0.943 |
| 202025_x_at | ACAA1    | 0.926 | 1.557 | 1.842 | 1     | 0.675 | 0.724 |
| 218253_s_at | LGTN     | 0.966 | 1.413 | 2.205 | 0.997 | 1.364 | 1.192 |
| 201197_at   | AMD1     | 0.96  | 1.609 | 1.912 | 0.964 | 1.139 | 1.041 |
| 204905_s_at | EEF1E1   | 0.996 | 1.558 | 2.124 | 0.997 | 1.07  | 1.291 |
| 211939_x_at | BTF3     | 0.973 | 1.532 | 2.059 | 0.989 | 0.839 | 0.998 |
| 205036_at   | LSM6     | 0.987 | 1.595 | 2.034 | 0.997 | 0.912 | 0.866 |
| 202596_at   | ENSA     | 0.948 | 1.453 | 2.059 | 0.996 | 1.153 | 1.038 |
| 200966_x_at | ALDOA    | 0.949 | 1.377 | 2.174 | 0.996 | 0.969 | 1.413 |
| 200041_s_at | BAT1     | 0.952 | 1.503 | 2.004 | 0.999 | 0.888 | 1.107 |
| 208833_s_at | ATXN10   | 0.887 | 1.249 | 2.093 | 0.993 | 0.941 | 0.822 |
| 221830_at   | RAP2A    | 0.999 | 1.518 | 2.183 | 0.99  | 1.487 | 1.423 |

|             |          |       |       |       |       |       |       |
|-------------|----------|-------|-------|-------|-------|-------|-------|
| 209337_at   | PSIP1    | 0.906 | 1.488 | 1.831 | 0.999 | 0.699 | 0.662 |
| 201293_x_at | PPIA     | 0.965 | 1.535 | 2.012 | 0.983 | 1.056 | 1.214 |
| 201872_s_at | ABCE1    | 0.997 | 1.534 | 2.147 | 0.976 | 1.215 | 1.804 |
| 213011_s_at | TPI1     | 0.977 | 1.555 | 2.02  | 0.998 | 1.015 | 2.033 |
| 210950_s_at | FDFT1    | 0.911 | 1.448 | 1.877 | 0.984 | 0.854 | 1.339 |
| 221571_at   | TRAF3    | 0.963 | 1.6   | 1.897 | 0.999 | 0.891 | 0.859 |
| 221532_s_at | WDR61    | 0.992 | 1.43  | 2.252 | 0.999 | 0.825 | 0.598 |
| 202325_s_at | ATP5J    | 0.941 | 1.464 | 1.979 | 0.989 | 1.191 | 0.932 |
| 203292_s_at | VPS11    | 0.991 | 0.724 | 0.415 | 0.999 | 0.743 | 0.838 |
| 218320_s_at | NDUFB11  | 0.951 | 1.387 | 2.127 | 0.991 | 1.284 | 0.952 |
| 206200_s_at | ANXA11   | 0.967 | 1.457 | 2.081 | 0.999 | 0.96  | 0.733 |
| 202961_s_at | ATP5J2   | 0.964 | 1.524 | 1.975 | 0.999 | 1.102 | 1.035 |
| 221737_at   | GNA12    | 0.972 | 1.959 | 1.562 | 0.985 | 1.075 | 0.982 |
| 219497_s_at | BCL11A   | 0.992 | 1.59  | 1.997 | 0.885 | 0.974 | 0.97  |
| 200824_at   | GSTP1    | 0.977 | 1.496 | 2.05  | 0.995 | 0.998 | 1.223 |
| 203008_x_at | TXNDC9   | 0.913 | 1.284 | 2.075 | 0.996 | 2.276 | 2.166 |
| 200912_s_at | EIF4A2   | 0.894 | 1.44  | 1.769 | 0.972 | 0.912 | 1.086 |
| 218374_s_at | C12orf4  | 0.88  | 1.433 | 1.721 | 0.993 | 0.686 | 0.513 |
| 212378_at   | GART     | 0.979 | 1.442 | 2.116 | 0.996 | 1.237 | 1.303 |
| 214683_s_at | CLK1     | 0.937 | 1.35  | 2.069 | 0.977 | 0.551 | 0.454 |
| 218226_s_at | NDUFB4   | 0.942 | 1.436 | 1.965 | 0.983 | 0.693 | 0.923 |
| 201754_at   | COX6C    | 0.935 | 1.538 | 1.806 | 0.999 | 1.354 | 1.159 |
| 200040_at   | KHDRBS1  | 0.947 | 1.531 | 1.857 | 0.999 | 0.774 | 1.235 |
| 202077_at   | NDUFAB1  | 0.999 | 1.505 | 2.094 | 0.997 | 1.663 | 1.167 |
| 201901_s_at | YY1      | 0.979 | 1.462 | 2.07  | 0.999 | 0.989 | 1.017 |
| 201210_at   | DDX3X    | 0.994 | 1.532 | 2.034 | 0.999 | 0.931 | 0.791 |
| 201746_at   | TP53     | 0.999 | 1.443 | 2.181 | 1     | 0.848 | 1.142 |
| 206095_s_at | FUSIP1   | 0.944 | 1.315 | 2.133 | 1     | 0.88  | 1.094 |
| 210017_at   | MALT1    | 0.966 | 1.492 | 1.965 | 0.999 | 0.705 | 0.931 |
| 201128_s_at | ACLY     | 0.999 | 1.561 | 2.005 | 0.997 | 1.076 | 1.037 |
| 200089_s_at | RPL4     | 0.975 | 1.461 | 2.038 | 1     | 0.947 | 0.923 |
| 201546_at   | TRIP12   | 0.991 | 1.535 | 2.001 | 0.993 | 0.905 | 1.368 |
| 221059_s_at | COTL1    | 0.928 | 1.377 | 1.955 | 0.999 | 0.885 | 0.864 |
| 201288_at   | ARHGDI B | 0.937 | 1.404 | 1.952 | 0.998 | 0.653 | 0.794 |
| 201157_s_at | NMT1     | 0.976 | 1.431 | 2.075 | 1     | 0.913 | 1.108 |
| 204174_at   | ALOX5AP  | 0.898 | 1.384 | 1.811 | 0.942 | 0.658 | 0.757 |
| 200658_s_at | PHB      | 0.996 | 1.37  | 2.235 | 0.974 | 1.235 | 1.864 |
| 200869_at   | RPL18A   | 0.894 | 1.316 | 1.872 | 0.978 | 0.607 | 0.959 |
| 221476_s_at | RPL15    | 0.964 | 1.474 | 1.939 | 0.999 | 0.641 | 0.838 |
| 211423_s_at | SC5DL    | 0.863 | 1.834 | 1.244 | 0.935 | 0.942 | 1.608 |
| 207243_s_at | CALM2    | 0.962 | 1.511 | 1.876 | 0.996 | 0.76  | 0.821 |
| 221020_s_at | SLC25A32 | 0.965 | 1.413 | 2.015 | 0.993 | 1.019 | 0.96  |
| 202086_at   | MX1      | 0.877 | 1.467 | 0.48  | 0.997 | 0.751 | 0.518 |
| 205070_at   | ING3     | 0.944 | 1.411 | 1.926 | 0.994 | 0.987 | 0.915 |
| 201322_at   | ATP5B    | 0.93  | 1.363 | 1.934 | 0.992 | 0.889 | 1.183 |
| 200823_x_at | RPL29    | 0.947 | 1.33  | 2.051 | 0.989 | 0.651 | 0.93  |
| 208673_s_at | SFRS3    | 0.998 | 1.459 | 2.076 | 0.986 | 0.919 | 1.095 |
| 215157_x_at | PABPC1   | 0.947 | 1.425 | 1.901 | 0.974 | 0.968 | 0.923 |
| 200088_x_at | RPL12    | 0.949 | 1.414 | 1.91  | 0.998 | 0.807 | 0.943 |
| 208864_s_at | TXN      | 0.997 | 1.265 | 2.339 | 0.981 | 1.359 | 1.208 |
| 205988_at   | CD84     | 0.996 | 1.443 | 2.046 | 1     | 0.766 | 0.736 |

|             |          |       |       |       |       |       |       |
|-------------|----------|-------|-------|-------|-------|-------|-------|
| 200075_s_at | GUK1     | 0.971 | 1.263 | 2.219 | 0.956 | 0.886 | 1.041 |
| 204258_at   | CHD1     | 0.948 | 1.385 | 1.926 | 0.999 | 0.771 | 0.969 |
| 215001_s_at | GLUL     | 0.973 | 1.227 | 2.283 | 0.995 | 0.528 | 0.809 |
| 200047_s_at | YY1      | 0.967 | 1.265 | 2.184 | 0.997 | 1.22  | 0.924 |
| 200738_s_at | PGK1     | 0.955 | 1.393 | 1.932 | 1     | 0.906 | 1.135 |
| 200057_s_at | NONO     | 0.952 | 1.39  | 1.922 | 0.998 | 0.66  | 0.888 |
| 200858_s_at | RPS8     | 0.933 | 1.369 | 1.867 | 0.989 | 0.859 | 0.841 |
| 201064_s_at | PABPC4   | 0.98  | 1.278 | 2.205 | 1     | 0.751 | 0.791 |
| 202727_s_at | IFNGR1   | 0.992 | 1.416 | 2.032 | 0.996 | 1.064 | 1.255 |
| 218011_at   | UBL5     | 0.999 | 1.454 | 2.006 | 0.992 | 1.008 | 0.787 |
| 200010_at   | RPL11    | 0.943 | 1.312 | 1.98  | 1     | 0.564 | 0.979 |
| 209267_s_at | SLC39A8  | 0.989 | 1.412 | 2.023 | 0.992 | 1.036 | 1.139 |
| 201931_at   | ETFA     | 0.943 | 1.443 | 1.793 | 0.994 | 1.213 | 1.122 |
| 201192_s_at | PITPNA   | 0.998 | 1.361 | 2.122 | 1     | 0.856 | 1.041 |
| 204023_at   | RFC4     | 0.951 | 1.378 | 1.894 | 0.946 | 1.217 | 0.614 |
| 200613_at   | AP2M1    | 0.931 | 1.378 | 1.811 | 0.987 | 0.597 | 0.754 |
| 208709_s_at | NRD1     | 0.998 | 1.42  | 2.008 | 0.966 | 0.825 | 1.048 |
| 200020_at   | TARDBP   | 0.978 | 1.373 | 1.991 | 0.978 | 1.225 | 1.014 |
| 203517_at   | MTX2     | 0.974 | 1.413 | 1.915 | 1     | 1.225 | 0.86  |
| 201757_at   | NDUFS5   | 0.959 | 1.334 | 1.954 | 0.999 | 1.178 | 1.064 |
| 202130_at   | RIOK3    | 0.986 | 1.999 | 1.376 | 1     | 0.821 | 0.708 |
| 211954_s_at | RANBP5   | 0.977 | 1.31  | 2.046 | 1     | 1.382 | 1.263 |
| 203516_at   | SNTA1    | 0.998 | 0.818 | 0.435 | 0.986 | 0.945 | 0.783 |
| 201857_at   | ZFR      | 0.961 | 1.372 | 1.879 | 0.999 | 0.815 | 0.804 |
| 208066_s_at | GTF2B    | 0.954 | 1.33  | 1.906 | 0.994 | 0.614 | 0.921 |
| 201695_s_at | NP       | 0.98  | 1.345 | 1.987 | 0.998 | 0.684 | 0.863 |
| 206158_s_at | CNBP     | 0.922 | 1.321 | 1.789 | 0.99  | 0.638 | 0.57  |
| 211985_s_at | CALM1    | 0.906 | 1.217 | 1.875 | 0.989 | 0.412 | 0.629 |
| 203403_s_at | RNF6     | 0.988 | 1.361 | 1.98  | 0.98  | 0.895 | 0.842 |
| 201194_at   | SEPW1    | 0.976 | 1.35  | 1.943 | 0.998 | 0.91  | 0.759 |
| 201897_s_at | CKS1B    | 0.936 | 1.373 | 1.753 | 0.998 | 1.187 | 1.238 |
| 207974_s_at | SKP1A    | 0.931 | 1.282 | 1.857 | 0.986 | 0.891 | 0.734 |
| 201292_at   | TOP2A    | 0.967 | 1.249 | 2.048 | 0.999 | 0.823 | 0.723 |
| 200713_s_at | MAPRE1   | 0.968 | 1.338 | 1.915 | 0.992 | 1.094 | 1.179 |
| 218090_s_at | BRWD2    | 0.986 | 1.301 | 2.005 | 0.998 | 1.544 | 1.11  |
| 204224_s_at | GCH1     | 0.995 | 1.237 | 2.122 | 1     | 1.316 | 1.423 |
| 217870_s_at | CMPK     | 0.949 | 1.194 | 1.997 | 0.994 | 1.001 | 0.794 |
| 208887_at   | EIF3S4   | 0.987 | 1.297 | 1.984 | 1     | 0.866 | 1.012 |
| 200704_at   | LITAF    | 0.978 | 1.243 | 1.995 | 1     | 0.88  | 1.119 |
| 209139_s_at | PRKRA    | 0.999 | 1.296 | 1.991 | 0.996 | 0.609 | 0.727 |
| 203433_at   | MTHFS    | 0.977 | 1.293 | 1.885 | 0.997 | 1.284 | 0.964 |
| 211501_s_at | EIF3S9   | 0.988 | 1.292 | 1.912 | 0.999 | 1.127 | 1.159 |
| 201924_at   | AFF1     | 0.984 | 0.771 | 0.499 | 0.97  | 0.614 | 0.532 |
| 209451_at   | TANK     | 0.957 | 1.172 | 1.966 | 1     | 1.628 | 1.204 |
| 200014_s_at | HNRPC    | 0.971 | 1.206 | 1.944 | 0.991 | 1.12  | 0.81  |
| 214022_s_at | IFITM1   | 0.995 | 0.846 | 0.477 | 0.996 | 0.762 | 0.298 |
| 204908_s_at | BCL3     | 0.978 | 1.095 | 2.12  | 0.998 | 1.137 | 1.934 |
| 208654_s_at | CD164    | 0.931 | 0.962 | 2.181 | 0.989 | 0.633 | 0.772 |
| 208018_s_at | HCK      | 0.996 | 1.142 | 2.073 | 0.999 | 1.1   | 1.568 |
| 202232_s_at | PCID1    | 0.972 | 1.09  | 1.95  | 0.995 | 0.892 | 0.691 |
| 201784_s_at | C11orf58 | 1     | 1.059 | 2.05  | 0.999 | 0.899 | 0.993 |

Supplementary table 2: Genes modulated at 24h post-treatment.

| Affy ID     | Symbol  | NL4.3 wt<br>8h | NL4.3<br>CD40L 8h | Anti CD40 8h | NL4.3 wt<br>24h | NL4.3<br>CD40L | Anti CD40<br>24h |
|-------------|---------|----------------|-------------------|--------------|-----------------|----------------|------------------|
| 216834_at   | RGS1    | 0.142          | 4.153             | 11.24        | 0.596           | 5.136          | 9.073            |
| 207900_at   | CCL17   | 0.997          | 5.285             | 9.862        | 0.991           | 8.147          | 12.94            |
| 206975_at   | LTA     | 0.997          | 4.769             | 11.76        | 0.984           | 5.893          | 9.963            |
| 207861_at   | CCL22   | 0.994          | 2.468             | 4.653        | 0.999           | 4.758          | 6.429            |
| 219841_at   | AICDA   | 0.948          | 3.398             | 8.564        | 0.959           | 3.429          | 5.403            |
| 201502_s_at | NFKBIA  | 0.993          | 5.037             | 7.961        | 1               | 3.411          | 5.807            |
| 205599_at   | TRAF1   | 0.894          | 7.514             | 16.76        | 0.575           | 1.823          | 3.59             |
| M10098_5_at | ---     | 1              | 0.282             | 0.22         | 0.953           | 3.713          | 3.902            |
| 207339_s_at | LTB     | 0.957          | 1.686             | 2.235        | 0.999           | 3.051          | 4.995            |
| 200953_s_at | CCND2   | 1              | 2.691             | 5.648        | 0.94            | 2.627          | 4.476            |
| 202644_s_at | TNFAIP3 | 0.983          | 3.74              | 5.819        | 0.998           | 2.666          | 4.927            |
| 202896_s_at | SIRPA   | 0.923          | 2.46              | 5.346        | 0.942           | 2.969          | 3.466            |
| M10098_M_at | ---     | 0.978          | 0.474             | 0.442        | 1               | 3.497          | 3.264            |
| 201887_at   | IL13RA1 | 0.987          | 1.707             | 3.649        | 0.999           | 2.865          | 3.772            |
| 204642_at   | EDG1    | 0.944          | 0.516             | 0.0619       | 0.997           | 0.392          | 0.238            |
| 53912_at    | SNX11   | 0.993          | 3.12              | 5.579        | 0.977           | 3.118          | 3.178            |
| 200788_s_at | PEA15   | 0.998          | 2.434             | 4.594        | 0.999           | 2.494          | 3.888            |
| 201669_s_at | MARCKS  | 0.92           | 5.79              | 13.66        | 0.941           | 1.53           | 5.174            |
| M10098_3_at | ---     | 0.974          | 0.46              | 0.4          | 0.992           | 2.907          | 2.746            |
| 217983_s_at | RNASET2 | 0.876          | 1.034             | 0.617        | 0.945           | 0.45           | 0.246            |
| 209509_s_at | DPAGT1  | 0.968          | 0.536             | 0.781        | 0.942           | 0.328          | 0.367            |
| 221234_s_at | BACH2   | 0.94           | 0.865             | 1.011        | 0.99            | 0.372          | 0.39             |
| 200940_s_at | RERE    | 0.92           | 1.091             | 0.85         | 1               | 0.409          | 0.375            |
| 205668_at   | LY75    | 0.927          | 3.41              | 3.919        | 0.999           | 2.381          | 2.668            |
| 201458_s_at | BUB3    | 0.933          | 1.143             | 1.432        | 0.999           | 0.402          | 0.401            |
| 204780_s_at | FAS     | 0.994          | 2.111             | 3.039        | 0.99            | 2.013          | 2.815            |
| 203408_s_at | SATB1   | 0.992          | 1.022             | 0.643        | 0.996           | 0.507          | 0.347            |
| 219358_s_at | CENTA2  | 0.997          | 1.592             | 1.116        | 0.943           | 2.76           | 1.778            |
| 205027_s_at | MAP3K8  | 0.838          | 0.807             | 1.027        | 0.987           | 0.364          | 0.489            |
| 204858_s_at | ECGF1   | 1              | 0.978             | 0.985        | 0.993           | 2.528          | 2.097            |
| 200965_s_at | ABLIM1  | 0.908          | 0.755             | 0.619        | 0.979           | 0.441          | 0.406            |
| 212852_s_at | TROVE2  | 0.969          | 1.556             | 2.258        | 1               | 2.113          | 2.53             |
| 205681_at   | BCL2A1  | 0.976          | 4.682             | 10.13        | 0.997           | 1.619          | 3.272            |
| 207522_s_at | ATP2A3  | 0.993          | 0.578             | 1.057        | 0.984           | 0.553          | 0.345            |
| 204638_at   | ACP5    | 0.98           | 0.729             | 0.553        | 0.995           | 0.652          | 0.3              |
| 203008_x_at | TXNDC9  | 0.913          | 1.284             | 2.075        | 0.996           | 2.276          | 2.166            |
| 212223_at   | IDS     | 0.995          | 0.659             | 0.96         | 0.996           | 0.352          | 0.579            |
| 210538_s_at | BIRC3   | 0.999          | 2                 | 4.317        | 0.991           | 1.427          | 3.341            |
| 210978_s_at | TAGLN2  | 0.822          | 1.614             | 5.761        | 1               | 1.467          | 3.3              |
| 207318_s_at | CDC2L5  | 0.886          | 1.188             | 1.223        | 0.992           | 0.362          | 0.57             |
| 222077_s_at | RACGAP1 | 0.963          | 1.333             | 0.842        | 0.987           | 2.235          | 2.068            |
| 201368_at   | ZFP36L2 | 0.891          | 0.833             | 0.954        | 0.995           | 0.444          | 0.477            |
| 210649_s_at | ARID1A  | 0.833          | 1.476             | 1.672        | 0.998           | 0.437          | 0.502            |
| 202446_s_at | PLSCR1  | 0.791          | 1.678             | 0.899        | 0.989           | 2.444          | 1.81             |
| 221675_s_at | CHPT1   | 0.954          | 0.753             | 0.598        | 0.948           | 0.375          | 0.538            |
| 219947_at   | CLEC4A  | 0.987          | 0.708             | 0.878        | 0.976           | 0.585          | 0.372            |
| 214022_s_at | IFITM1  | 0.995          | 0.846             | 0.477        | 0.996           | 0.762          | 0.298            |
| 200629_at   | WARS    | 1              | 3.051             | 4.271        | 0.992           | 1.796          | 2.386            |
| 200932_s_at | DCTN2   | 0.952          | 0.882             | 0.905        | 0.972           | 0.49           | 0.446            |

|             |          |       |       |       |       |       |       |
|-------------|----------|-------|-------|-------|-------|-------|-------|
| 204352_at   | TRAF5    | 0.997 | 1.114 | 0.928 | 0.995 | 0.433 | 0.53  |
| 205861_at   | SPIB     | 0.768 | 2.286 | 3.367 | 0.98  | 1.568 | 2.633 |
| 201263_at   | TARS     | 0.996 | 2.066 | 2.997 | 0.998 | 1.749 | 2.398 |
| 218084_x_at | FXVD5    | 0.965 | 0.736 | 0.896 | 1     | 0.424 | 0.561 |
| 204203_at   | CEBPG    | 0.948 | 1.566 | 2.265 | 0.945 | 1.656 | 2.215 |
| 205013_s_at | ADORA2A  | 0.99  | 1.465 | 1.734 | 0.985 | 1.915 | 2.08  |
| 201586_s_at | SFPQ     | 0.756 | 2.552 | 2.573 | 0.999 | 1.885 | 2.167 |
| 202501_at   | MAPRE2   | 0.947 | 1.112 | 1.086 | 0.999 | 0.531 | 0.462 |
| 213757_at   | EIF5A    | 0.989 | 1.774 | 2.234 | 1     | 1.607 | 2.523 |
| 205997_at   | ADAM28   | 0.963 | 0.884 | 0.763 | 1     | 0.512 | 0.486 |
| 217979_at   | TSPAN13  | 0.989 | 0.614 | 0.529 | 0.999 | 0.492 | 0.507 |
| 201079_at   | SYNGR2   | 0.94  | 2.07  | 2.54  | 0.993 | 1.849 | 2.121 |
| 208982_at   | PECAM1   | 0.746 | 0.537 | 0.351 | 0.966 | 0.617 | 0.383 |
| 203528_at   | SEMA4D   | 1     | 1.081 | 0.929 | 0.988 | 0.628 | 0.394 |
| 217989_at   | DHRS8    | 0.999 | 0.854 | 0.948 | 0.998 | 0.467 | 0.542 |
| 208885_at   | LCP1     | 0.814 | 3.04  | 4.958 | 0.991 | 1.35  | 2.842 |
| 201737_s_at | Mar-06   | 1     | 1.015 | 1.246 | 0.969 | 0.493 | 0.489 |
| 1053_at     | RFC2     | 0.996 | 2.178 | 2.795 | 0.997 | 1.672 | 2.304 |
| 208944_at   | TGFBR2   | 0.985 | 0.902 | 0.95  | 0.997 | 0.464 | 0.555 |
| 35974_at    | LRMP     | 0.702 | 1.112 | 0.931 | 0.992 | 0.469 | 0.544 |
| 206181_at   | SLAMF1   | 0.998 | 2.431 | 3.417 | 0.993 | 1.386 | 2.738 |
| 214864_s_at | GRHPR    | 0.909 | 1.919 | 2.354 | 0.968 | 1.768 | 2.029 |
| 214683_s_at | CLK1     | 0.937 | 1.35  | 2.069 | 0.977 | 0.551 | 0.454 |
| 208927_at   | SPOP     | 0.99  | 1.465 | 1.72  | 0.97  | 0.449 | 0.551 |
| 221269_s_at | SH3BGRL3 | 0.881 | 0.877 | 1.136 | 0.994 | 0.397 | 0.658 |
| 201010_s_at | TXNIP    | 0.99  | 0.685 | 0.565 | 0.994 | 0.476 | 0.552 |
| 201892_s_at | IMPDH2   | 0.989 | 2.012 | 3.196 | 0.974 | 1.593 | 2.23  |
| 209682_at   | CBLB     | 0.896 | 0.872 | 0.805 | 0.979 | 0.48  | 0.536 |
| 217906_at   | KLHDC2   | 0.991 | 1.057 | 1.228 | 0.971 | 0.596 | 0.426 |
| 208998_at   | UCP2     | 0.98  | 0.75  | 0.755 | 1     | 0.604 | 0.45  |
| 207196_s_at | TNIP1    | 0.926 | 1.692 | 2.406 | 1     | 1.784 | 2.058 |
| 214359_s_at | HSP90AB1 | 0.862 | 1.76  | 4.767 | 1     | 0.607 | 2.199 |
| 203893_at   | TAF9     | 0.997 | 1.719 | 3.01  | 0.993 | 1.675 | 2.129 |
| 206760_s_at | FCER2    | 0.997 | 3.541 | 6.568 | 0.89  | 1.127 | 2.528 |
| 219540_at   | ZNF267   | 0.8   | 5.041 | 7.555 | 0.948 | 1.837 | 1.757 |
| 202820_at   | AHR      | 0.783 | 3.475 | 5.217 | 0.999 | 2.117 | 1.688 |
| 210785_s_at | C1orf38  | 0.992 | 1.037 | 0.836 | 0.999 | 0.46  | 0.608 |
| 202439_s_at | IDS      | 0.992 | 1.206 | 0.909 | 1     | 0.59  | 0.475 |
| 204385_at   | KYNU     | 0.853 | 2.462 | 4.81  | 0.966 | 1.22  | 2.723 |
| 200904_at   | HLA-E    | 0.997 | 0.961 | 1.137 | 0.999 | 0.459 | 0.614 |
| 201690_s_at | TPD52    | 0.979 | 1.041 | 1.01  | 1     | 0.631 | 0.449 |
| 207688_s_at | INHBC    | 0.999 | 1.156 | 1.286 | 0.997 | 1.578 | 2.2   |
| 201721_s_at | LAPTM5   | 0.825 | 1.381 | 1.799 | 0.986 | 0.446 | 0.649 |
| 218285_s_at | BDH2     | 0.991 | 0.892 | 1.04  | 0.974 | 0.682 | 0.416 |
| 212588_at   | PTPRC    | 0.939 | 0.984 | 1.056 | 0.976 | 0.5   | 0.571 |
| 219209_at   | IFIH1    | 0.953 | 0.884 | 1.319 | 0.995 | 2.065 | 1.595 |
| 219371_s_at | KLF2     | 0.994 | 0.53  | 0.512 | 0.986 | 0.602 | 0.492 |
| 204116_at   | IL2RG    | 0.999 | 1.892 | 2.802 | 1     | 1.347 | 2.418 |
| 221750_at   | HMGCS1   | 0.993 | 1.176 | 1.732 | 0.993 | 1.527 | 2.083 |
| 209860_s_at | ANXA7    | 0.979 | 1.966 | 3.317 | 0.961 | 1.385 | 2.116 |
| 35626_at    | SGSH     | 0.982 | 0.73  | 0.747 | 0.998 | 0.632 | 0.501 |

|             |         |       |       |       |       |       |       |
|-------------|---------|-------|-------|-------|-------|-------|-------|
| 204790_at   | SMAD7   | 0.995 | 1.171 | 1.226 | 0.955 | 0.507 | 0.572 |
| 201321_s_at | SMARCC2 | 0.983 | 0.873 | 1.141 | 0.999 | 0.648 | 0.499 |
| 201853_s_at | CDC25B  | 0.972 | 0.648 | 0.554 | 0.997 | 0.673 | 0.486 |
| 218356_at   | FTSJ2   | 0.999 | 0.927 | 1.304 | 0.991 | 2.195 | 1.353 |
| 204446_s_at | ALOX5   | 0.997 | 0.568 | 0.485 | 0.999 | 0.705 | 0.48  |
| 205928_at   | ZNF443  | 0.997 | 0.969 | 0.942 | 0.984 | 0.67  | 0.5   |
| 201924_at   | AFF1    | 0.984 | 0.771 | 0.499 | 0.97  | 0.614 | 0.532 |
| 203787_at   | SSBP2   | 0.975 | 0.762 | 0.594 | 0.979 | 0.716 | 0.467 |
| 212416_at   | SCAMP1  | 0.998 | 1.516 | 0.856 | 0.985 | 0.786 | 0.441 |
| 202284_s_at | CDKN1A  | 0.993 | 1.524 | 1.821 | 1     | 1.394 | 2.003 |
| 209239_at   | NFKB1   | 0.989 | 1.68  | 2.799 | 0.993 | 1.198 | 2.293 |
| 202876_s_at | PBX2    | 1     | 1.136 | 1.296 | 1     | 0.455 | 0.792 |
| 213416_at   | ITGA4   | 0.587 | 1.775 | 3.007 | 0.974 | 0.413 | 0.847 |
| 202495_at   | TBCC    | 0.387 | 1.214 | 1.429 | 0.945 | 0.53  | 0.625 |
| 209795_at   | CD69    | 0.941 | 1.57  | 2.69  | 0.989 | 1.111 | 2.358 |
| 202428_x_at | DBI     | 0.962 | 2.059 | 3.261 | 0.942 | 1.214 | 1.907 |
| 201251_at   | PKM2    | 0.968 | 2.517 | 3.075 | 1     | 1.204 | 2.098 |
| 200658_s_at | PHB     | 0.996 | 1.37  | 2.235 | 0.974 | 1.235 | 1.864 |
| 201700_at   | CCND3   | 0.949 | 1.011 | 1.221 | 0.999 | 0.903 | 0.472 |
| 201459_at   | RUVBL2  | 0.85  | 1.549 | 2.098 | 0.995 | 1.082 | 2.133 |
| 205790_at   | SCAP1   | 0.87  | 1.761 | 1.601 | 0.965 | 0.462 | 0.87  |
| 202191_s_at | GAS7    | 0.955 | 0.36  | 0.518 | 1     | 0.886 | 0.491 |
| 218171_at   | VPS4B   | 0.974 | 0.961 | 1.005 | 1     | 0.926 | 0.488 |
| 213318_s_at | BAT3    | 0.922 | 1.323 | 1.622 | 0.999 | 0.467 | 0.967 |
| 202530_at   | MAPK14  | 0.978 | 1.134 | 1.003 | 0.998 | 0.48  | 0.947 |
| 201563_at   | SORD    | 1     | 2.437 | 2.255 | 0.943 | 2.007 | 0.933 |
| 202105_at   | IGBP1   | 0.996 | 1.012 | 1.592 | 0.979 | 0.523 | 1.006 |
| 212506_at   | PICALM  | 0.86  | 2.123 | 2.58  | 0.928 | 0.903 | 0.507 |
